# Supplementary material for: Photodegradation of Ciprofloxacin and Levofloxacin by Au@ZnONPs-MoS2-rGO Nanocomposites
Source: Preprints.org preprint supplement (doi:10.20944/preprints202301.0419.v1), 2023-01-24
Supplement: Supplementary file 2 [file supplementary]

# Supplementary Information

## Photodegradation of Ciprofloxacin and Levofloxacin by Au@ZnONPs-MoS<sub>2</sub>-rGO Nanocomposites

Abniel Machín<sup>1,\*</sup>, Loraine Soto-Vázquez<sup>2</sup>, Diego García<sup>3</sup>, María C. Cotto<sup>4</sup>, Dayna Ortiz<sup>4</sup>, Pedro J. Berríos-Rolón<sup>4</sup>, Kenneth Fontánez<sup>5</sup>, Edgard Resto<sup>2</sup>, Carmen Morant<sup>6</sup>, Florian Petrescu<sup>4,7</sup>, and Francisco Márquez<sup>4,\*</sup>

<sup>1</sup> Department of Natural Sciences and Technology, Division of Natural Sciences, Technology and Environment, Universidad Ana G. Méndez-Cupey Campus, 00926PR, United States

<sup>2</sup> Materials Characterization Center Inc., Molecular Sciences Research Center, University of Puerto Rico, San Juan, PR 00926, USA; [loraine.soto@mcc.com.pr](mailto:loraine.soto@mcc.com.pr) (L.S.-V.); [resto@mcc.com.pr](mailto:resto@mcc.com.pr) (E.R.)

<sup>3</sup> Department of Biochemistry, School of Medicine, University of Puerto Rico, Medical Sciences Campus, San Juan, 00936PR, United States; [diego.garcia13@upr.edu](mailto:diego.garcia13@upr.edu) (D.G.)

<sup>4</sup> Nanomaterials Research Group, Department of Natural Sciences and Technology, Division of Natural Sciences, Technology and Environment, Universidad Ana G. Méndez-Gurabo Campus, 00778PR, United States; [mcotto48@uagm.edu](mailto:mcotto48@uagm.edu) (M.C.); [ortizd1@uagm.edu](mailto:ortizd1@uagm.edu) (D.O.); [berriosp1@uagm.edu](mailto:berriosp1@uagm.edu) (P.B.-R.)

<sup>5</sup> Department of Chemistry, University of Puerto Rico, Rio Piedras Campus, San Juan, 00925PR, United States; [kenneth.fontanez@upr.edu](mailto:kenneth.fontanez@upr.edu) (K.F.)

<sup>6</sup> Department of Applied Physics, Autonomous University of Madrid, and Instituto de Ciencia de Materiales Nicolás Cabrera, 28049, Madrid, Spain; [c.morant@uam.es](mailto:c.morant@uam.es) (C.M.)

<sup>7</sup> IFToMM-ARoTMM, Bucharest Polytechnic University, 060042, Bucharest, (CE), Romania; [florian.petrescu@upb.ro](mailto:florian.petrescu@upb.ro) (F.P.)

\* Correspondence: [machina1@uagm.edu](mailto:machina1@uagm.edu) (AM); [fmarquez@uagm.edu](mailto:fmarquez@uagm.edu) (FM)  
Tel.: +1-787-878-2612 (ext. 220) (A.M.); +1-787-743-7979 (ext. 4250) (F.M.)

**Table S1.** BET surface area of the synthesized catalysts.

| Catalyst                              | BET surface area (m <sup>2</sup> g <sup>-1</sup> ) |
|---------------------------------------|----------------------------------------------------|
| ZnONPs                                | 67                                                 |
| 1%Au@ZnONPs-1%MoS <sub>2</sub> -1%rGO | 98                                                 |
| 3%Au@ZnONPs-1%MoS <sub>2</sub> -1%rGO | 107                                                |
| 5%Au@ZnONPs-1%MoS <sub>2</sub> -1%rGO | 118                                                |
| 1%Au@ZnONPs-3%MoS <sub>2</sub> -1%rGO | 115                                                |
| 3%Au@ZnONPs-3%MoS <sub>2</sub> -1%rGO | 121                                                |
| 5%Au@ZnONPS-3%MoS <sub>2</sub> -1%rGO | 143                                                |
| 1%Au@ZnONPS-5%MoS <sub>2</sub> -1%rGO | 129                                                |
| 3%Au@ZnONPS-5%MoS <sub>2</sub> -1%rGO | 134                                                |
| 5%Au@ZnONPS-5%MoS <sub>2</sub> -1%rGO | 151                                                |

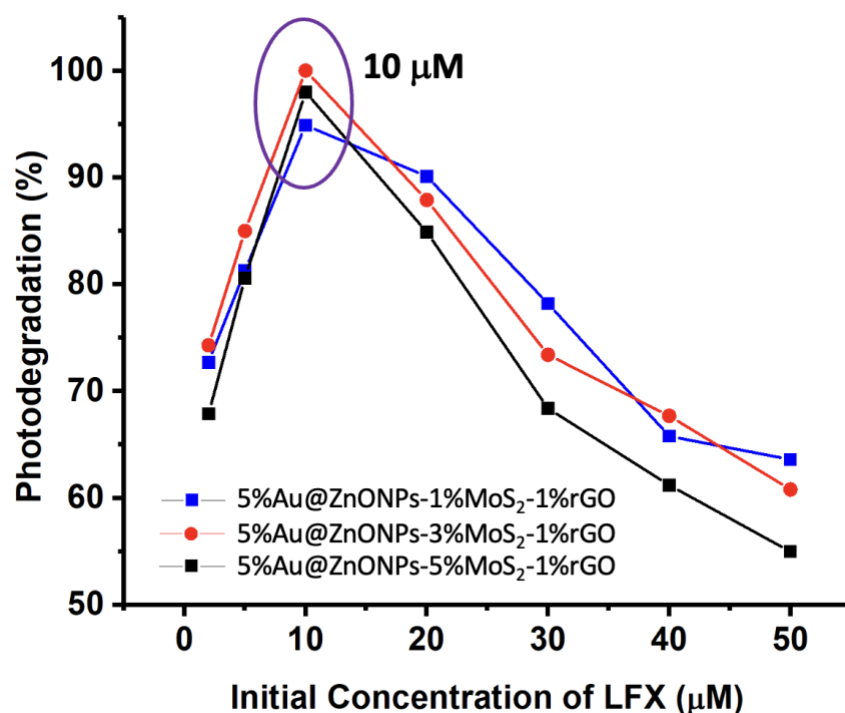

**Figure S1.** Evaluation of the initial concentration of LFX on the catalytic efficiency of 5% Au@ZnONPs-1% MoS<sub>2</sub>-1% rGO, 5% Au@ZnONPs-3% MoS<sub>2</sub>-1% rGO, and 5% Au@ZnONPs-5% MoS<sub>2</sub>-1% rGO, in the photodegradation reaction.

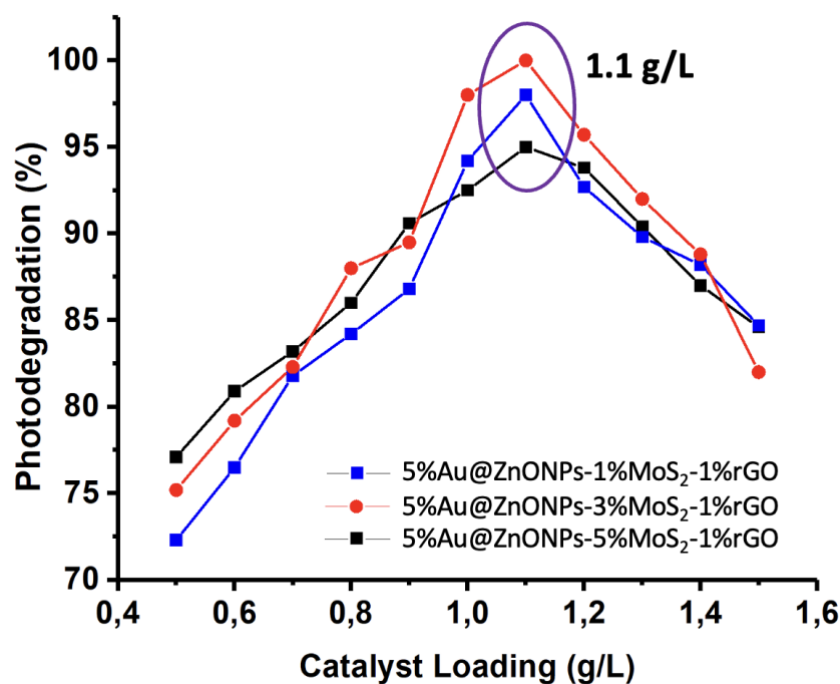

**Figure S2.** Evaluation of the catalyst loading of 5% Au@ZnONPs-1% MoS<sub>2</sub>-1% rGO, 5% Au@ZnONPs-3% MoS<sub>2</sub>-1% rGO, and 5% Au@ZnONPs-5% MoS<sub>2</sub>-1% rGO on the efficiency of the photodegradation reaction of LFX.

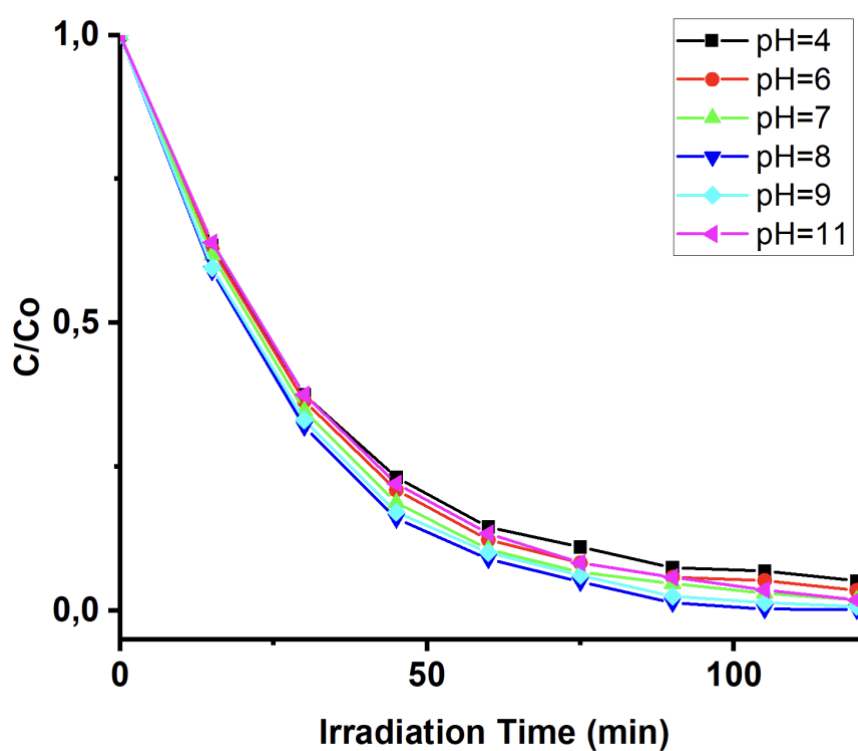

**Figure S3.** Photocatalytic activity of 5% Au@ZnONPs-3% MoS<sub>2</sub>-1% rGO on the degradation of LFX under irradiation at different pH.

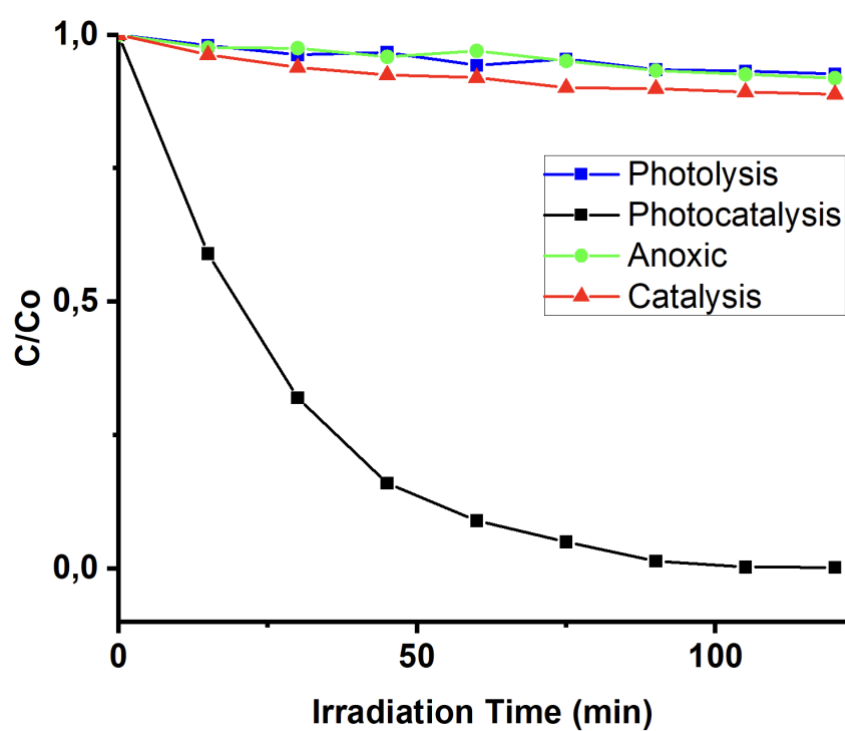

**Figure S4.** Control experiments for 5% Au@ZnONPs-3% MoS<sub>2</sub>-1% rGO with LFX, under irradiation.

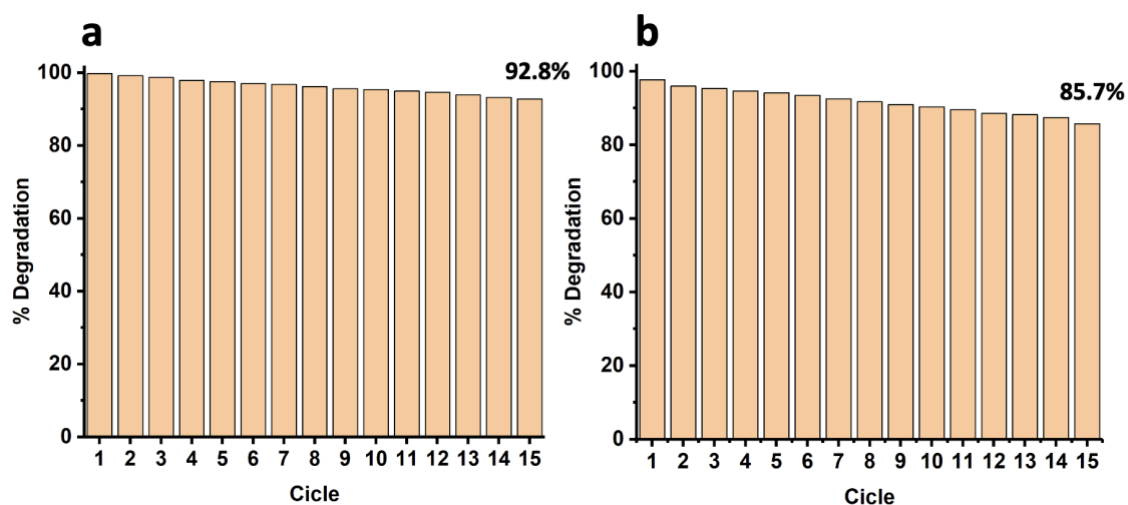

**Figure S5.** Recyclability tests: 5% Au@ZnONPs-3% MoS<sub>2</sub>-1% rGO after 15 consecutive catalytic cycles of photodegradation of LFX (a); and 1% Au@ZnONPs-3% MoS<sub>2</sub>-1% rGO after 15 consecutive catalytic cycles of photodegradation of CFX (b).

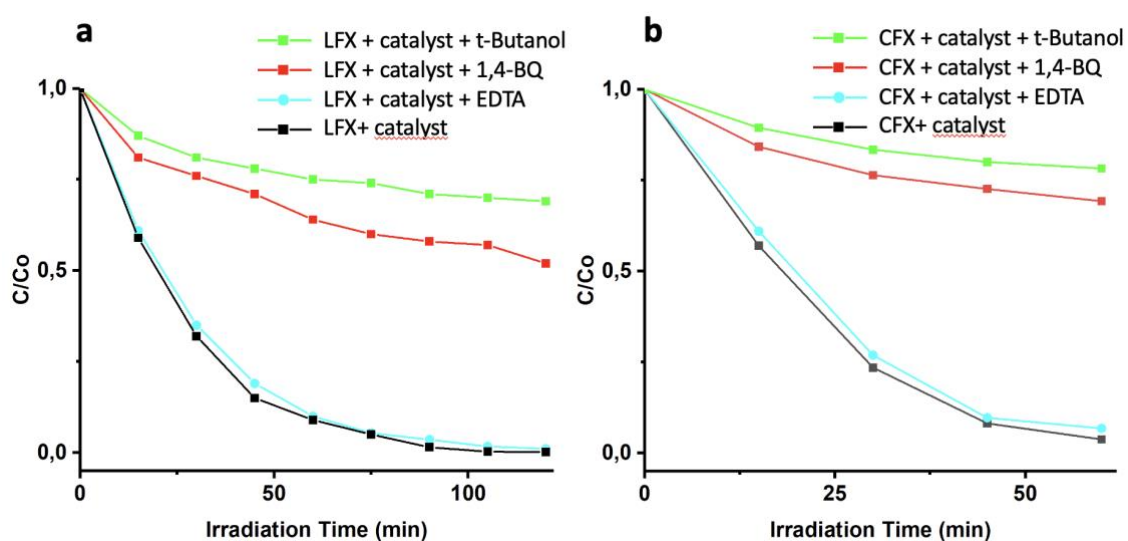

**Figure S6.** Photocatalytic activity in the presence of different scavengers under irradiation: 5% Au@ZnONPs-3% MoS<sub>2</sub>-1% rGO on the degradation of LFX at pH=8 (a); and 1% Au@ZnONPs-3% MoS<sub>2</sub>-1% rGO on the degradation of CFX at pH=7 (b).
